# Supplementary material for: The Relationship between Social Anhedonia and Perceived Pleasure from Food—An Exploratory Investigation on a Consumer Segment with Depression and Anxiety
Source: MDPI journal article supplement (doi:10.3390/foods11223659), 2022-11-16
Supplement: s1 [file s1]

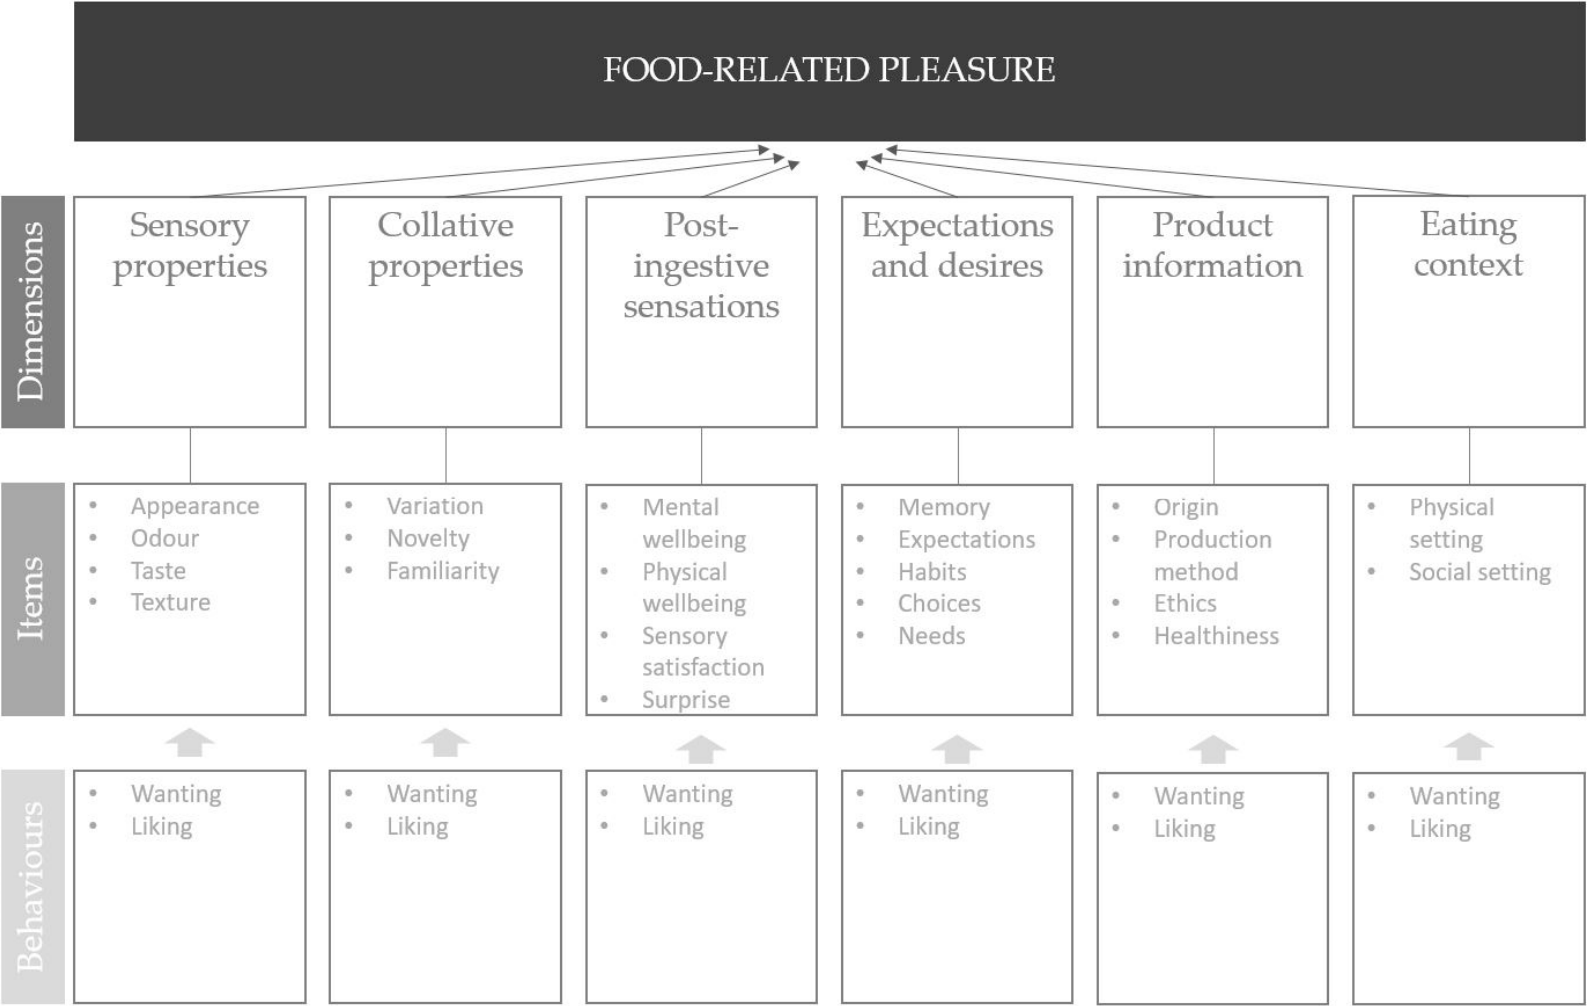

**Figure S1.** Schematic conceptualisation of the key dimensions, items, and behavioural elements involved in the individual food-related pleasure response, allowing a holistic study of quantitative (level of pleasure) and qualitative (drivers of pleasure) aspects of food-related pleasure. The model is kindly borrowed from Andersen, B. V., Chan, R. C. K., & Byrne, D. V. (2021). A Conceptual Framework for Multi-Dimensional Measurements of Food Related Pleasure—The Food Pleasure Scale. *Foods*, 10(9), 2044. <https://doi.org/10.3390/foods10092044>

**Table S1.** Multivariate Regression by Odd's Ratio on all variables for each of the three segments.

|                                                   | Low anhedonia<br>n=537 |         | Intermediate anhedonia<br>n=360 |         | High anhedonia<br>n=154 |         |
|---------------------------------------------------|------------------------|---------|---------------------------------|---------|-------------------------|---------|
|                                                   | Odd's Ratio (CI)       | p-value | Odd's Ratio (CI)                | p-value | Odd's Ratio (CI)        | p-value |
| <b>Sociodemographic</b>                           |                        |         |                                 |         |                         |         |
| <b>Gender (m/f)</b>                               |                        |         |                                 |         |                         |         |
| Male                                              | 1                      |         | 1                               |         | 1                       |         |
| Female                                            | 0.96 (0.74-1.23)       | 0.737   | 0.87 (0.67-1.14)                | 0.312   | 1.38 (0.97-1.96)        | 0.068   |
| <b>Age</b>                                        | 1.02 (0.99-1.05)       | 0.214   | 1.06 (0.99-1.14)                | 0.284   | 0.99 (0.95-1.03)        | 0.749   |
| <b>Education (years)<sup>1</sup></b>              | 0.99 (0.92-1.05)       | 0.668   | 0.99 (0.97-1.02)                | 0.110   | 0.93 (0.85-1.02)        | 0.130   |
| <b>Fathers age</b>                                | 1.00 (0.97-1.02)       | 0.802   | 1.04 (1.01-1.07)                | 0.570   | 1.02 (0.98-1.06)        | 0.264   |
| <b>Fathers education<sup>1</sup></b>              | 1.05 (1.01-1.08)       | 0.017   | 0.97 (0.93-1.00)                | 0.086   | 0.97 (0.92-1.02)        | 0.288   |
| <b>Mothers age</b>                                | 0.99 (0.97-1.02)       | 0.610   | 0.99 (0.96-1.02)                | 0.618   | 1.03 (0.99-1.07)        | 0.166   |
| <b>Mothers education<sup>1</sup></b>              | 1.03 (1.00-1.07)       | 0.035   | 0.98 (0.95-1.01)                | 0.186   | 0.97 (0.93-1.02)        | 0.227   |
| <b>Monthly income of whole family<sup>2</sup></b> |                        |         |                                 |         |                         |         |
| - ≤ 2500 RMB                                      | 0.31 (0.12-0.72)       | 0.010   | 3.26 (1.48-7.44)                | 0.004   | 0.89 (0.25-2.43)        | 0.840   |
| - 2501-5000 RMB                                   | 0.91 (0.6-1.38)        | 0.659   | 1.25 (0.81-1.92)                | 0.317   | 0.81 (0.43-1.44)        | 0.489   |
| - 5001-10000 RMB                                  | 1                      |         | 1                               |         | 1                       |         |
| - 10001-20000 RMB                                 | 0.82 (0.61-1.10)       | 0.189   | 1.26 (0.93-1.72)                | 0.140   | 0.98 (0.65-1.46)        | 0.912   |
| - ≥ 20000 RMB                                     | 1.22 (0.84-1.276)      | 0.303   | 0.96 (0.64-1.43)                | 0.861   | 0.70 (0.40-1.21)        | 0.217   |
| <b>Health</b>                                     |                        |         |                                 |         |                         |         |
| <b>Mental illness diagnosis</b>                   |                        |         |                                 |         |                         |         |
| <b>Family hist. mental illnesses</b>              |                        |         |                                 |         |                         |         |
| - Yes                                             | NA                     |         | NA                              |         | NA                      |         |
| - No                                              | 1                      |         | 1                               |         | 1                       |         |
| - Unsure                                          | 0.36 (0.16-0.74)       | 0.008   | 1.66 (0.81-3.33)                | 0.156   | 2.18 (0.93-4.66)        | 0.055   |
| <b>PHQ-9 score<sup>3</sup></b>                    | 0.81 (0.79-0.84)       | <0.001  | 1.09 (1.06-1.11)                | <0.001  | 1.19 (1.15-1.23)        | <0.001  |
| <b>GAD-7 score<sup>4</sup></b>                    | 0.82 (0.79-0.85)       | <0.001  | 1.09 (1.06-1.12)                | <0.001  | 1.18 (1.14-1.22)        | <0.001  |
| <b>Pleasure</b>                                   |                        |         |                                 |         |                         |         |
| <b>RSAS score<sup>5</sup></b>                     |                        |         |                                 |         |                         |         |
| <b>FPS<sup>6</sup> – I get pleasure from</b>      |                        |         |                                 |         |                         |         |
| Memories                                          | 2.30 (1.25-4.42)       | 0.009   | 0.52 (0.29-0.95)                | 0.031   | 0.73 (0.36-1.63)        | 0.401   |
| Expectations                                      | 1.66 (0.96-2.91)       | 0.073   | 0.81 (0.47-1.43)                | 0.462   | 0.59 (0.31-1.19)        | 0.118   |
| Needs                                             | 1.39 (0.77-2.55)       | 0.284   | 0.99 (0.54-1.89)                | 0.982   | 0.58 (0.29-1.25)        | 0.136   |
| Choices                                           | 2.17 (1.28-3.78)       | 0.005   | 0.73 (0.43-1.23)                | 0.225   | 0.49 (0.27-0.91)        | 0.018   |
| Habits                                            | 1.48 (1.02-2.14)       | 0.038   | 0.72 (0.50-1.05)                | 0.083   | 0.86 (0.53-1.43)        | 0.544   |
| Ethical values                                    | 1.47 (1.05-2.07)       | 0.026   | 0.95 (0.67-1.36)                | 0.771   | 0.56 (0.37-0.86)        | 0.007   |

|                                     |                  |        |                  |       |                  |        |
|-------------------------------------|------------------|--------|------------------|-------|------------------|--------|
| Product information                 | 1.80 (1.29-2.51) | <0.001 | 0.63 (0.45-0.88) | 0.007 | 0.76 (0.50-1.18) | 0.210  |
| Physical surroundings               | 1.87 (1.18-3.02) | 0.008  | 0.72 (0.45-1.14) | 0.158 | 0.59 (0.35-1.06) | 0.067  |
| Eating with others                  | 2.80 (1.89-4.21) | <0.001 | 1.19 (0.80-1.79) | 0.393 | 0.19 (0.13-0.29) | <0.001 |
| Eating alone                        | 0.57 (0.44-0.75) | <0.001 | 1.51 (1.13-2.03) | 0.005 | 1.50 (1.01-2.28) | 0.053  |
| Variation                           | 1.93 (1.15-3.32) | 0.014  | 0.77 (0.46-1.31) | 0.323 | 0.51 (0.28-0.97) | 0.030  |
| Familiarity                         | 1.67 (1.05-2.70) | 0.032  | 1.05 (0.65-1.74) | 0.837 | 0.42 (0.25-0.73) | 0.001  |
| Novelty                             | 2.25 (1.42-3.65) | <0.001 | 0.73 (0.47-1.16) | 0.180 | 0.45 (0.27-0.77) | 0.003  |
| Appearance                          | 1.53 (0.97-2.43) | 0.071  | 0.91 (0.57-1.47) | 0.703 | 0.56 (0.33-1.00) | 0.040  |
| Odor                                | 1.26 (0.68-2.36) | 0.472  | 1.19 (0.62-2.39) | 0.615 | 0.54 (0.27-1.17) | 0.095  |
| Taste                               | 2.06 (1.08-4.10) | 0.031  | 0.67 (0.36-1.02) | 0.221 | 0.57 (0.28-1.29) | 0.148  |
| Texture                             | 1.56 (0.84-2.99) | 0.164  | 0.97 (0.51-1.90) | 0.927 | 0.50 (0.25-1.09) | 0.063  |
| Pleased senses                      | 3.59 (1.99-6.87) | <0.001 | 0.43 (0.25-0.73) | 0.002 | 0.56 (0.30-1.11) | 0.077  |
| Physical sensations                 | 2.20 (1.45-3.41) | <0.001 | 0.58 (0.39-0.88) | 0.009 | 0.64 (0.39-1.10) | 0.090  |
| Mental sensations                   | 1.99 (1.22-3.31) | 0.007  | 0.70 (0.43-1.15) | 0.150 | 0.56 (0.32-1.03) | 0.051  |
| Surprise                            | 2.24 (1.41-3.63) | <0.001 | 0.57 (0.36-0.89) | 0.014 | 0.65 (0.38-1.18) | 0.138  |
| <b>FPS<sup>6</sup> – Importance</b> |                  |        |                  |       |                  |        |
| Memories                            |                  |        |                  |       |                  |        |
| - Not very important                | 0.62 (0.36-1.06) | 0.086  | 1.04 (0.61-1.75) | 0.885 | 1.99 (1.03-3.78) | 0.037  |
| - Neither nor                       | 1                |        | 1                |       | 1                |        |
| - Very important                    | 1.49 (1.10-2.02) | 0.011  | 0.65 (0.48-0.89) | 0.007 | 1.00 (0.65-1.58) | 0.985  |
| Expectations                        |                  |        |                  |       |                  |        |
| - Not very important                | 0.65 (0.38-1.08) | 0.102  | 1.03 (0.62-1.72) | 0.900 | 1.84 (0.98-3.39) | 0.053  |
| - Neither nor                       | 1                |        | 1                |       | 1                |        |
| - Very important                    | 1.50 (1.11-2.04) | 0.009  | 0.72 (0.53-0.99) | 0.042 | 0.80 (0.53-1.25) | 0.317  |
| Needs                               |                  |        |                  |       |                  |        |
| - Not very important                | 1.00 (0.60-1.68) | 0.987  | 0.72 (0.42-1.24) | 0.244 | 1.54 (0.83-2.82) | 0.168  |
| - Neither nor                       | 1                |        | 1                |       | 1                |        |
| - Very important                    | 1.54 (1.13-2.11) | 0.007  | 0.82 (0.59-1.13) | 0.223 | 0.62 (0.41-0.95) | 0.026  |
| Choices                             |                  |        |                  |       |                  |        |
| - Not very important                | 0.83 (0.52-1.32) | 0.437  | 0.73 (0.45-1.17) | 0.191 | 2.08 (1.19-3.63) | 0.010  |
| - Neither nor                       | 1                |        | 1                |       | 1                |        |
| - Very important                    | 1.67 (1.24-2.26) | <0.001 | 0.64 (0.48-1.14) | 0.005 | 0.80 (0.53-1.23) | 0.305  |
| Habits                              |                  |        |                  |       |                  |        |
| - Not very important                | 0.86 (0.57-1.29) | 0.455  | 0.91 (0.60-1.38) | 0.656 | 1.51 (0.89-2.54) | 0.120  |
| - Neither nor                       | 1                |        | 1                |       | 1                |        |
| - Very important                    | 1.49 (1.13-1.98) | 0.006  | 0.69 (0.52-0.93) | 0.015 | 0.87 (0.58-1.31) | 0.489  |
| Ethical values                      |                  |        |                  |       |                  |        |
| - Not very important                | 0.68 (0.46-0.99) | 0.042  | 1.09 (0.74-1.61) | 0.651 | 1.76 (1.06-2.94) | 0.030  |

|                       |                  |        |                  |       |                  |        |
|-----------------------|------------------|--------|------------------|-------|------------------|--------|
| - Neither nor         | 1                |        | 1                |       | 1                |        |
| - Very important      | 1.19 (0.89-1.59) | 0.106  | 0.76 (0.56-1.03) | 0.075 | 1.17 (0.76-1.81) | 0.485  |
| Product information   |                  |        |                  |       |                  |        |
| - Not very important  | 0.73 (0.50-1.06) | 0.098  | 1.24 (0.85-1.80) | 0.261 | 1.20 (0.73-1.93) | 0.469  |
| - Neither nor         | 1                |        | 1                |       | 1                |        |
| - Very important      | 1.60 (1.20-2.12) | 0.001  | 0.67 (0.50-0.91) | 0.009 | 0.79 (0.53-1.19) | 0.253  |
| Physical surroundings |                  |        |                  |       |                  |        |
| - Not very important  | 0.51 (0.32-0.81) | 0.005  | 1.37 (0.87-2.17) | 0.171 | 1.69 (0.97-2.89) | 0.059  |
| - Neither nor         | 1                |        | 1                |       | 1                |        |
| - Very important      | 1.33 (1.00-1.77) | 0.049  | 0.88 (0.66-1.20) | 0.421 | 0.70 (0.47-1.05) | 0.078  |
| Eating with others    |                  |        |                  |       |                  |        |
| - Not very important  | 0.51 (0.33-0.76) | 0.001  | 0.89 (0.60-1.32) | 0.567 | 2.84 (1.79-4.53) | <0.001 |
| - Neither nor         | 1                |        | 1                |       | 1                |        |
| - Very important      | 1.81 (1.36-2.41) | <0.001 | 0.68 (0.51-0.92) | 0.012 | 0.57 (0.37-0.88) | 0.010  |
| Eating alone          |                  |        |                  |       |                  |        |
| - Not very important  | 1.30 (0.96-1.77) | 0.090  | 0.81 (0.58-1.11) | 0.194 | 0.84 (0.51-1.34) | 0.465  |
| - Neither nor         | 1                |        | 1                |       | 1                |        |
| - Very important      | 0.76 (0.57-1.01) | 0.061  | 0.96 (0.71-1.29) | 0.193 | 1.77 (1.20-2.63) | 0.004  |
| Variation             |                  |        |                  |       |                  |        |
| - Not very important  | 0.77 (0.45-1.31) | 0.344  | 0.85 (0.50-1.45) | 0.563 | 1.86 (0.98-3.49) | 0.056  |
| - Neither nor         | 1                |        | 1                |       | 1                |        |
| - Very important      | 1.50 (1.09-2.07) | 0.014  | 0.74 (0.53-1.03) | 0.070 | 0.78 (0.51-1.24) | 0.279  |
| Familiarity           |                  |        |                  |       |                  |        |
| - Not very important  | 0.85 (0.54-1.33) | 0.481  | 0.92 (0.58-1.45) | 0.731 | 1.47 (0.83-2.58) | 0.176  |
| - Neither nor         | 1                |        | 1                |       | 1                |        |
| - Very important      | 1.45 (1.08-1.94) | 0.014  | 0.74 (0.54-1.00) | 0.047 | 0.84 (0.56-1.28) | 0.398  |
| Novelty               |                  |        |                  |       |                  |        |
| - Not very important  | 0.76 (0.49-1.19) | 0.232  | 1.24 (0.79-1.93) | 0.347 | 1.10 (0.62-1.90) | 0.732  |
| - Neither nor         | 1                |        | 1                |       | 1                |        |
| - Very important      | 1.58 (1.19-2.09) | 0.001  | 0.76 (0.57-1.02) | 0.071 | 0.66 (0.45-0.97) | 0.033  |
| Appearance            |                  |        |                  |       |                  |        |
| - Not very important  | 0.60 (0.39-0.92) | 0.020  | 1.03 (0.66-1.59) | 0.893 | 2.28 (1.31-3.96) | 0.003  |
| - Neither nor         | 1                |        | 1                |       | 1                |        |
| - Very important      | 1.06 (0.79-1.42) | 0.696  | 0.89 (0.66-1.22) | 0.468 | 1.11 (0.72-1.73) | 0.663  |
| Odor                  |                  |        |                  |       |                  |        |
| - Not very important  | 0.51 (0.29-0.90) | 0.020  | 1.35 (0.77-2.35) | 0.289 | 1.80 (0.91-3.51) | 0.087  |
| - Neither nor         | 1                |        | 1                |       | 1                |        |
| - Very important      | 1.08 (0.78-1.50) | 0.630  | 0.99 (0.70-1.40) | 0.937 | 0.87 (0.56-1.40) | 0.559  |

|                      |                  |        |                  |        |                   |        |
|----------------------|------------------|--------|------------------|--------|-------------------|--------|
| Taste                |                  |        |                  |        |                   |        |
| - Not very important | 0.72 (0.37-1.35) | 0.308  | 1.04 (0.55-1.93) | 0.906  | 1.58 (0.71-3.39)  | 0.250  |
| - Neither nor        | 1                |        | 1                |        | 1                 |        |
| - Very important     | 1.58 (1.09-2.28) | 0.015  | 0.67 (0.47-1.02) | 0.037  | 0.85 (0.52-1.44)  | 0.516  |
| Texture              |                  |        |                  |        |                   |        |
| - Not very important | 0.42 (0.21-0.83) | 0.015  | 0.66 (0.35-1.23) | 0.193  | 5.76 (2.68-12.85) | <0.001 |
| - Neither nor        | 1                |        | 1                |        | 1                 |        |
| - Very important     | 1.67 (1.15-2.44) | 0.008  | 0.51 (0.35-0.75) | <0.001 | 1.35 (0.76-2.59)  | 0.332  |
| Pleased senses       |                  |        |                  |        |                   |        |
| - Not very important | 0.49 (0.25-0.95) | 0.040  | 0.81 (0.45-1.47) | 0.495  | 3.30 (1.62-6.78)  | 0.001  |
| - Neither nor        | 1                |        | 1                |        | 1                 |        |
| - Very important     | 2.03 (1.42-2.94) | <0.001 | 0.48 (0.34-0.69) | <0.001 | 0.98 (0.59-1.71)  | 0.953  |
| Physical sensations  |                  |        |                  |        |                   |        |
| - Not very important | 0.37 (0.21-0.62) | <0.001 | 1.31 (0.80-2.13) | 0.278  | 2.70 (1.50-4.84)  | <0.001 |
| - Neither nor        | 1                |        | 1                |        | 1                 |        |
| - Very important     | 1.32 (0.98-1.78) | 0.070  | 0.76 (0.56-1.03) | 0.079  | 0.95 (0.62-1.50)  | 0.830  |
| Mental sensations    |                  |        |                  |        |                   |        |
| - Not very important | 0.57 (0.34-0.96) | 0.037  | 1.17 (0.71-1.93) | 0.531  | 1.78 (0.95-3.31)  | 0.068  |
| - Neither nor        | 1                |        | 1                |        | 1                 |        |
| - Very important     | 1.62 (1.17-2.25) | 0.004  | 0.65 (0.47-0.91) | 0.013  | 0.83 (0.53-1.32)  | 0.415  |
| Surprise             |                  |        |                  |        |                   |        |
| - Not very important | 0.35 (0.21-0.55) | <0.001 | 1.63 (1.04-2.55) | 0.033  | 2.31 (1.33-4.00)  | 0.003  |
| - Neither nor        | 1                |        | 1                |        | 1                 |        |
| - Very important     | 1.08 (0.81-1.45) | 0.604  | 0.96 (0.70-1.31) | 0.779  | 0.92 (0.60-1.44)  | 0.713  |

<sup>1</sup>Education includes primary school, <sup>2</sup>CNY: Chinese Yuan, <sup>3</sup>PHQ-9: 9-item Patient Health Questionnaire, <sup>4</sup>GAD-7: 7-item General Anxiety Disorder, <sup>5</sup>RSAS: Revised Social Anhedonia Scale, <sup>6</sup>FPS: Food Pleasure Scale
